# Supplementary material
Source: PubMed Central journal article supplement (PMC1691774)
Supplement: 15306287s01.pdf [file 15306287s01.pdf]

These are electronic appendices to the paper by Kearney & Stuart 2004 Repeated evolution of limblessness and digging heads in worm lizards revealed by DNA from old bones. *Proc. R. Soc. Lond. B* **271**, 1677–1683. (DOI 10.1098/rspb.2004.2771.)

Electronic appendices are refereed with the text. However, no attempt is made to impose a uniform editorial style on the electronic appendices.

## ELECTRONIC APPENDIX A

Oligonucleotide primers used to amplify and sequence squamate nuclear DNA in this study. 'L' and 'H' refer to light and heavy strands, respectively.

| Primer     | Product      | Sequence                           |
|------------|--------------|------------------------------------|
| L-lizcmos  | <i>c-mos</i> | 5'-CTAGCTTGGTGTTCATAGACTGG-3'      |
| H-cmosII   | <i>c-mos</i> | 5'-GCAAATGAGTAGATGTCTGCC-3'        |
| H-cmosIII  | <i>c-mos</i> | 5'-GGTGATGGCAAATGAGTAGAT-3'        |
| L-230cmos  | <i>c-mos</i> | 5'-TGTCCCTGCCAATCAGGATAGT-3'       |
| H-450cmos  | <i>c-mos</i> | 5'-CATCCAAAGTCTCCAATCTTG-3'        |
| L-420cmos  | <i>c-mos</i> | 5'-ATCTGGATTTAAAACCTGCC-3'         |
| L-RAG1b    | RAG-1        | 5'-TTCCAGCCATTGCATGCTCT-3'         |
| H-snRAG1   | RAG-1        | 5'-ATTGCCAATGTCACAGTGCA-3'         |
| L-snRAG1   | RAG-1        | 5'-GGATGGGAGATGTCAGTGAGAA-3'       |
| H-RAG1b    | RAG-1        | 5'-GACTGCCTGGCATTTCATTTT-3'        |
| L-140RAG1  | RAG-1        | 5'-ACGATTTTCGATATGATGCAGCTTTGG-3'  |
| H-311RAG1  | RAG-1        | 5'-TCATGAGCGTGAAGGAGAATCGAAC-3'    |
| L-288 RAG1 | RAG-1        | 5'-CAGCGAAAAGCATGGCTGTGG-3'        |
| H-430RAG1  | RAG-1        | 5'-GTGAGAGTCTCATGATCTGATTCATCTG-3' |
| H-455RAG1  | RAG-1        | 5'-TGGACTCAGGATGGCTGTGAG-3'        |
| H-470RAG1  | RAG-1        | 5'-TCTCTTTCTGCTACAAGAGGGCT-3'      |
| L-385RAG1  | RAG-1        | 5'-TTGAAGAGAACAAGCCCAATTCAGAG-3'   |
| H-603RAG1  | RAG-1        | 5'-TAGAGCCTGAGGCTTCAAGGC-3'        |

## ELECTRONIC APPENDIX B

Taxa used in this study. CAS = California Academy of Sciences; CG = Carl Gans private collection; FMNH = Field Museum of Natural History; LSUMZ = Louisiana State University Museum of Natural Science; MTD = Museum für Tierkunde, Dresden; NJK = Nathan J. Kley private collection; MVZ = Museum of Vertebrate Zoology.

| Family         | Taxon                          | Source       | Tissue Type                          | Year collected,<br>if bone | GenBank No. (c-mos / RAG-1) |
|----------------|--------------------------------|--------------|--------------------------------------|----------------------------|-----------------------------|
| Rhineuridae    | <i>Rhineura floridana</i>      | LSUMZ H-9100 | Fresh                                |                            | AY444021/AY444047           |
| Rhineuridae    | <i>Rhineura floridana</i>      | CAS 200844   | Fresh                                |                            | AY444022/AY444048           |
| Blanidae       | <i>Blanus cinereus</i>         | MVZ 232069   | Fresh                                |                            | AY444019/AY444045           |
| Blanidae       | <i>Blanus cinereus</i>         | GenBank      | -                                    |                            | AY234227/not available      |
| Blanidae       | <i>Blanus strauchi</i>         | NJK Bs 02-1  | Fresh                                |                            | AY444024/AY444050           |
| Bipedidae      | <i>Bipes sp.</i>               | unvouchered  | Fresh                                |                            | AY444018/AY444044           |
| Bipedidae      | <i>Bipes biporus</i>           | GenBank      | -                                    |                            | AF039482/not available      |
| Trogonophidae  | <i>Agamodon anguliceps</i>     | CG 2440      | Dry bone; 7 ribs                     | 1962                       | AY444013/AY444040           |
| Trogonophidae  | <i>Diplometopon zarudnyi</i>   | NJK Dz 02-2  | Fresh                                |                            | AY444023/AY444049           |
| Trogonophidae  | <i>Diplometopon zarudnyi</i>   | GenBank      | -                                    |                            | AF148709/not available      |
| Trogonophidae  | <i>Trogonophis wiegmanni</i>   | MVZ 162541   | Fresh                                |                            | AY444025/AY444051           |
| Amphisbaenidae | <i>Amphisbaena sp.</i>         | LSUMZ H-9099 | Fresh                                |                            | AY444020/AY444046           |
| Amphisbaenidae | <i>Amphisbaena alba</i>        | CG 1216      | Dry bone; 2 vertebrae, 3 ribs        | 1958                       | AY444016/AY444042           |
| Amphisbaenidae | <i>Amphisbaena camura</i>      | MTD 43461    | Fresh (ethanol-preserved specimen)   |                            | AY444026/AY444052           |
| Amphisbaenidae | <i>Anops kingii</i>            | CG 2776      | Dry bone; 6 vertebrae w/ assoc. ribs | 1963                       | AY444012/AY444039           |
| Amphisbaenidae | <i>Aulura anomala</i>          | CG 2766      | Dry bone; 3 vertebrae, 6 ribs        | 1963                       | AY444015/no sequence        |
| Amphisbaenidae | <i>Chirindia swynnertoni</i>   | CG 4037      | Dry bone; number not recorded        | 1969                       | AY444010/AY444037           |
| Amphisbaenidae | <i>Cynisca leucura</i>         | CG 3759      | Dry bone; 3 vertebrae w/ assoc. ribs | 1968                       | AY444011/AY444038           |
| Amphisbaenidae | <i>Geocalamus acutus</i>       | FMNH 262014  | Fresh                                |                            | AY444017/AY444043           |
| Amphisbaenidae | <i>Leposternon sp.</i>         | CG 57177     | Dry bone; 3 vertebrae, 6 ribs        | date unavailable           | AY444014/AY444041           |
| Amphisbaenidae | <i>Monopeltis capensis</i>     | FMNH 80030   | Wet bone; 3 vertebrae                | 1957                       | AY444009/AY444036           |
| Typhlopidae    | <i>Ramphotyphlops braminus</i> | FMNH 258665  | Fresh                                |                            | AF544717/AY444062           |
| Loxocemidae    | <i>Loxocemus bicolor</i>       | NJK Lb 02-1  | Fresh                                |                            | AY444035/AY444061           |
| Dibamidae      | <i>Dibamus montanus</i>        | FMNH 258662  | Fresh                                |                            | AY444027/AY444053           |
| Scincidae      | <i>Mabuya multifasciata</i>    | FMNH 255530  | Fresh                                |                            | AY444029/AY444055           |
| Anguidae       | <i>Ophisaurus gracilis</i>     | FMNH 258689  | Fresh                                |                            | AY444030/AY444056           |
| Gekkonidae     | <i>Gekko gecko</i>             | FMNH 258696  | Fresh                                |                            | AY444028/AY444054           |
